# Supplementary material for: Plasmonic Au nanoparticles enhance the photogenerated electron efficiency for carbon dioxide photoreduction
Source: Royal Society of Chemistry journal article supplement (doi:10.1039/d3nj05636h), 2024-01-01
Supplement: d3nj05636h1.pdf [file d3nj05636h1.pdf]

# Plasmonic Au nanoparticles enhance photogenerated electrons efficiency for carbon dioxide photoreduction

*Jiachao Dai<sup>a,1</sup>, Kang Zhong<sup>a,1</sup>, Yuanbin She<sup>b,\*</sup>, Jinman Yang<sup>a</sup>, Yingjie Hua<sup>d</sup>, Xingwang Zhu<sup>c,\*</sup>, Hui Xu<sup>a</sup> and Huaming Li<sup>a,\*</sup>*

<sup>a</sup> School of the Environment and Safety Engineering, Institute for Energy Research, Jiangsu University, Zhenjiang 212013, P.R. China

<sup>b</sup> College of Chemical Engineering Zhejiang University of Technology Hangzhou 310014, P.R. China

<sup>c</sup> College of Environmental Science and Engineering, College of Mechanical Engineering, Yangzhou University, Yangzhou 225009, P.R. China

<sup>d</sup> The Key Laboratory of Electrochemical Energy Storage and Energy Conversion of Hainan Province, School of Chemistry and Chemical Engineering, Hainan Normal University, Haikou 571158, P.R. China

\*Corresponding author.

E-mail addresses: sheyb@zjut.edu.cn (Y. She); zxw@yzu.edu.cn (X. Zhu);

lhm@ujs.edu.cn (H. Li)

## Characterization of the photocatalysts

The X-ray diffraction (XRD) with Cu K $\alpha$  ( $\lambda = 1.5418 \text{ \AA}$ ) as a source is a Shimadzu XRD-6100 diffractometer, which was used to characterize phases structures of the as-prepared photocatalysts. The range of  $2\theta$  is from  $10^\circ$  to  $80^\circ$ , and the scan rate is  $0.1167 \text{ s}^{-1}$ . High resolution transmission electron microscope (HRTEM) images of products were used to observe the lattice fringe and the morphology on a FEI Talos F200X G2 with an accelerating voltage of 200 kV. X-ray photoelectron spectroscopy (XPS) of the photocatalyst was obtained by using an ESCALAB MKII spectrometer with 20 kV of Mg K $\alpha$  radiation. Ultraviolet visible (UV-vis) diffuse reflectance data were recorded using UV-vis spectrophotometer (Shimadzu UV-3600 plus, Japan), and BaSO $_4$  was used as a reflectance standard material. UPS spectrum was collected on an unfiltered HeI (21.22 eV) gas discharge lamp and a total instrumental energy resolution of 100 meV by using a Thermo ESCALAB 250XI. A QuantaMaster and TimeMaster Spectrofluorometer was used to investigate photoluminescence (PL) spectroscopy. *In-situ* FTIR spectra were obtained by using a Thermo Scientific Nicolet iS50.

## Photocatalytic activity measurement

The photocatalytic CO $_2$  reduction activities of the as-obtained samples were assessed in a liquid-solid reaction system with a 300 mL closed quartz reactor (Labsolar-6A, Beijing PerfectLight). Firstly, 10 mg of the sample was dispersed in 10 mL acetonitrile (CH $_3$ CN) aqueous solution ( $V_{\text{CH}_3\text{CN}}: V_{\text{H}_2\text{O}} = 3: 2$ ), and then, add 2 mL of triethanolamine (TEOA) as the hole sacrificial reagent, followed by degasification to eliminate the air. The light intensity was measured using the light intensity meter (PerfectLight). The light intensity is approximately  $300 \text{ W/cm}^2$  (PLS-SXE 300C (BF), Beijing Perfectlight). The photocatalytic reaction temperature was kept at  $5^\circ \text{C}$ . Maintaining this temperature is to avoid photothermal effects. The entire reaction system is in a CO $_2$  atmosphere with a pressure of 80 kPa. A gas chromatograph (GC2002, KeChuang) equipped with a thermal conductivity detector (TCD) and

hydrogen flame ionized detector (FID) was used to determine the amount of the gas products.

### **Photoelectrochemical test**

An electrochemical workstation of 660B (CHI660B, Chenhua Instrument Company, Shanghai, China) was performed for electrochemical measurement using a three-electrode system. Photocurrent and electrochemical impedance spectroscopy (EIS) measurements of samples were carried out on it. In the three-electrode system of electrochemical workstation, the reference electrode was a saturated calomel electrode (SCE), and the platinum wire was used as the counter electrode. The working electrode was prepared as follows: 5 mg photocatalyst powder dispersed in 2 mL glycol solution, then 20  $\mu\text{L}$  suspended coated in  $10 \times 5$  mm indium-tin-oxide (ITO) glass and dried for  $60^\circ\text{C}$  to remove ethanol for 12 h. Put the above three electrodes into the electrolyte solution of 0.1 M  $\text{Na}_2\text{SO}_4$ . The light source is a 300 W Xe lamp (PLS-SXE3, Beijing Perfectlight). At room temperature, started electrochemical measurement has applied no voltage between the electrodes.

### **Computational methods**

In this work, density functional theory (DFT) calculations were performed for structural optimization as implemented in the Vienna ab-initio Simulation Package (VASP). A spin-polarized GGA PBE functional [11], all-electron plane-wave basis sets with an energy cutoff of 520 eV, and a projector augmented wave (PAW) method were adopted [12, 13]. A  $(3 \times 3 \times 1)$  Monkhorst-Pack mesh was used for the Brillouin-zone integrations to be sampled. The conjugate gradient algorithm was used in the optimization. The convergence threshold was set  $1 \times 10^{-4}$  eV in total energy and 0.05 eV/Å in force on each atom.
